# Supplementary material for: The effect of Sr(OH)2 on the hydrogen storage properties of the Mg(NH2)2–2LiH system
Source: Royal Society of Chemistry journal article supplement (doi:10.1039/c7cp00748e), 2017-01-01
Supplement: c7cp00748e1.pdf [file c7cp00748e1.pdf]

# The effect of $\text{Sr}(\text{OH})_2$ on the hydrogen storage properties of the $\text{Mg}(\text{NH}_2)_2\text{-2LiH}$ system

Hujun Cao,<sup>a\*</sup> Han Wang,<sup>b</sup> Claudio Pistidda,<sup>a</sup> Chiara Milanese,<sup>c</sup> Weijin Zhang,<sup>b</sup> Anna-Lisa Chaudhary,<sup>a</sup> Antonio Santoru,<sup>a</sup> Sebastiano Garroni,<sup>d</sup> Jozef Bednarcik,<sup>e</sup> Hanns-Peter Liermann,<sup>e</sup> Ping Chen,<sup>b</sup> Thomas Klassen<sup>a</sup> and Martin Dornheim<sup>a</sup>

a. Institute of Materials Research, Materials Technology, Helmholtz-Zentrum Geesthacht GmbH, Max-Planck-Straße 1, D-21502 Geesthacht, Germany.

E-Mail: [hujun.cao@hzg.de](mailto:hujun.cao@hzg.de); Fax: + 49 04152 / 87-2625; Tel: +49 04152 / 87-2643

b. Dalian National Laboratory for Clean Energy, Dalian Institute of Chemical Physics, Chinese Academy of Sciences, Dalian 116023, China.

c. Pavia H<sub>2</sub> Lab, Department of Chemistry, Physical Chemistry Section, University of Pavia, Viale Taramelli 16, I-27100 Pavia, Italy

d. Department of Chemistry and Pharmacy, INSTM, Via Vienna 2, I-07100 Sassari, Italy

e. Deutsches Elektronen-Synchrotron a Research Centre of the Helmholtz Association, Notkestraße 85, Germany.

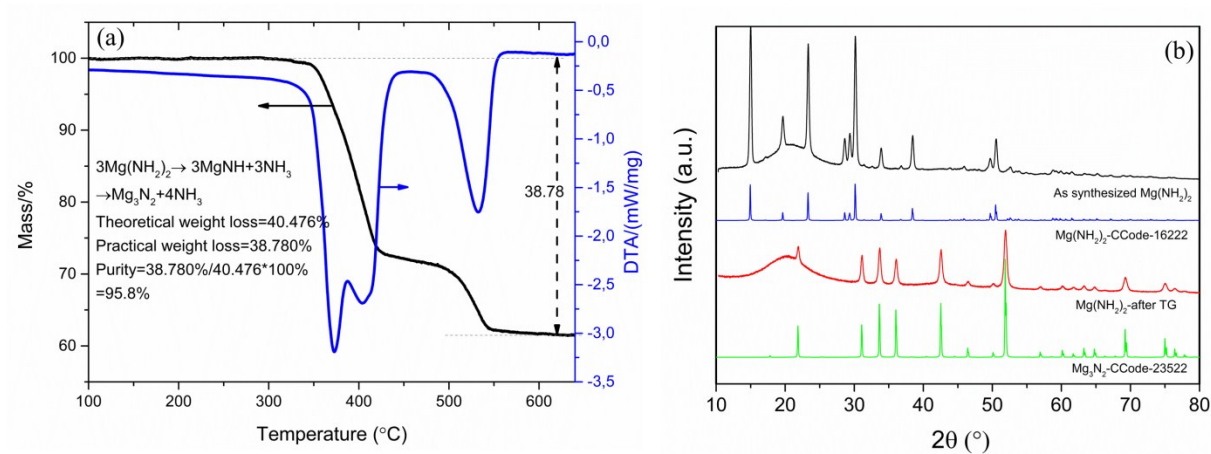

Figure S1. (a) TG-DTA curves of the as prepared  $\text{Mg}(\text{NH}_2)_2$ , heated from 30 to 650 °C with a heating rate of 10 °C/min, under 50 ml/min Argon flow. (b) PXD of the as synthesized  $\text{Mg}(\text{NH}_2)_2$  and after TG ( $\text{Mg}_3\text{N}_2$ ). Based on the TG-DTA and PXD results, the purity of  $\text{Mg}(\text{NH}_2)_2$  is ca. 95.8%. PXD tests were carried out with a Bruker D8 discover X-ray diffractometer, using Cu radiation ( $\lambda=0.154184$  nm, 50 kV, 1000  $\mu\text{A}$ ), with a scanning rate of 0.05 °/s. Air tight sample holders were used (Bruker, Germany) to prevent contamination of the sample.

of <72 characters]

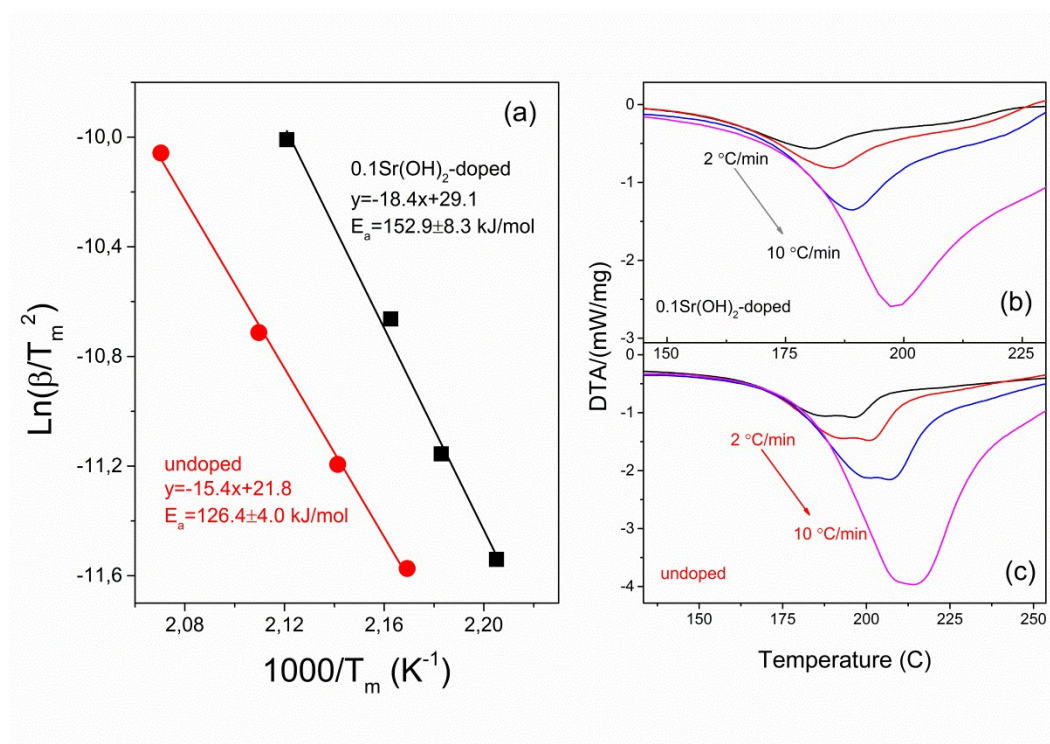

Figure S2. Kissinger plots (a) of the undoped and 0.1Sr(OH)<sub>2</sub>-doped samples; and DTA curves of the 0.1Sr(OH)<sub>2</sub>-doped (b) and the undoped (c) samples with a heating rate of 2, 3, 5 and 10 °C/min, respectively. It should be pointed out that the  $E_a$  of the undoped sample was calculated based on the first reaction peak.

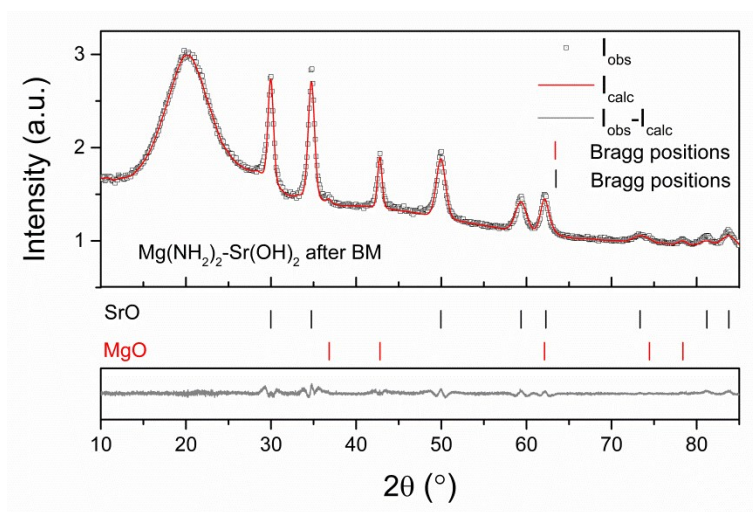

Figure S3. PXD pattern of the ball milled  $\text{Mg}(\text{NH}_2)_2$ - $\text{Sr}(\text{OH})_2$  mixture.

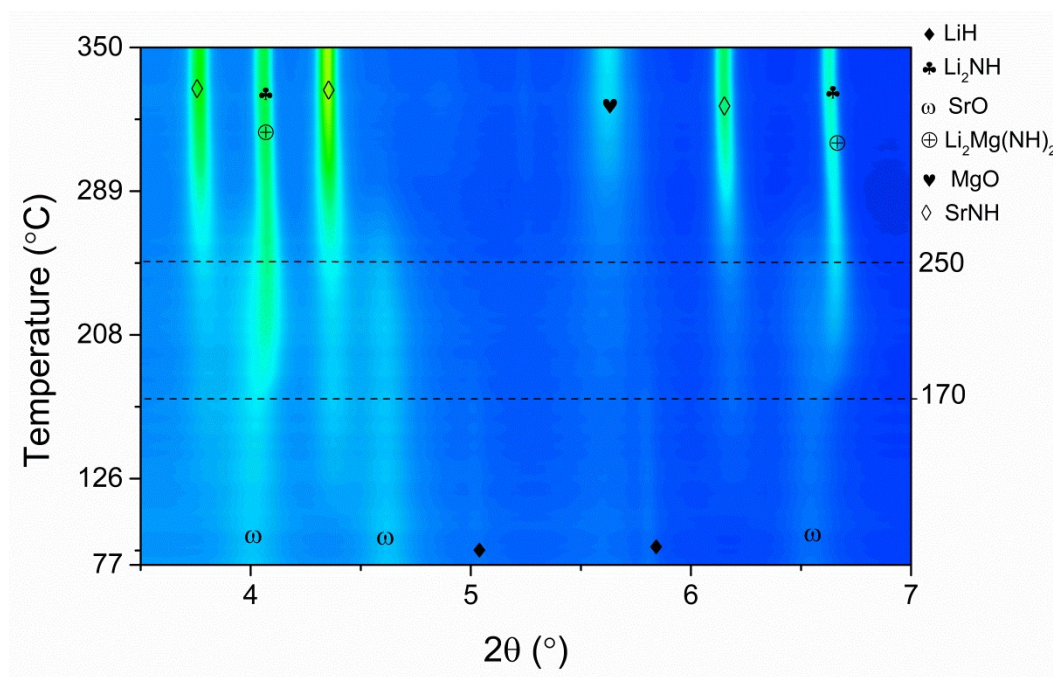

Figure S4. Dehydrogenation contour plot of the 0.2 Sr(OH)<sub>2</sub>-doped sample in the 2θ range between 3.5 and 7 (°) (heating rate of 10 °C /min, λ=0.20745 Å).

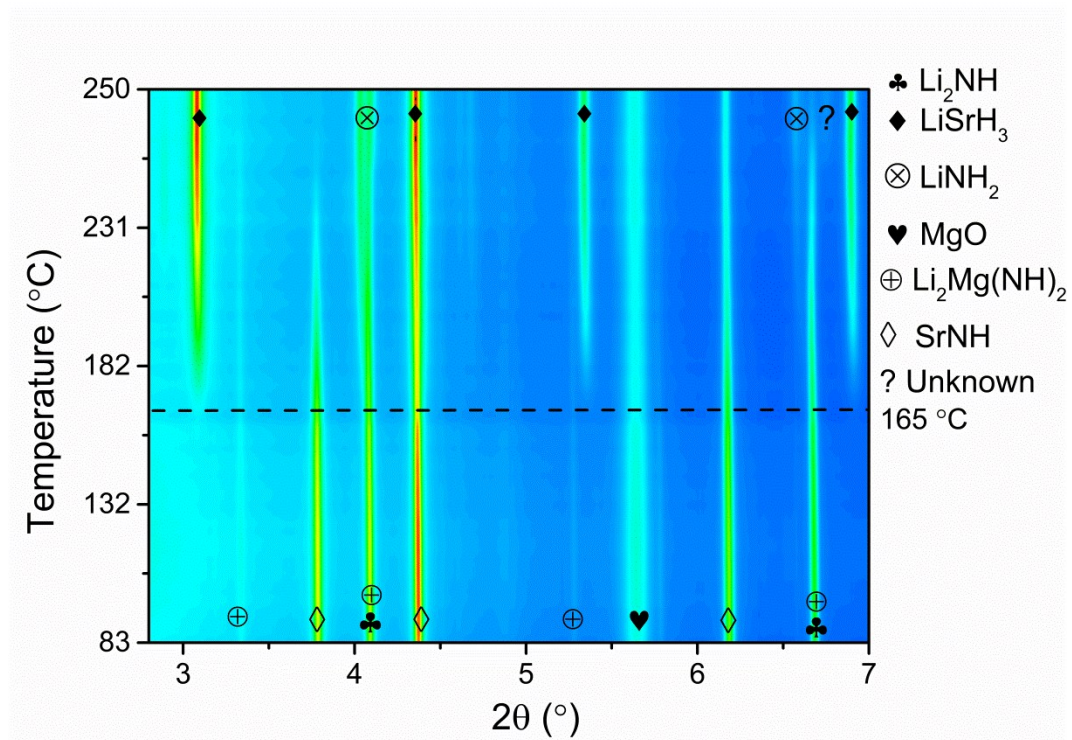

Figure S5. Contour plot of re-hydrogenation curves of  $0.2\text{Sr}(\text{OH})_2$ -doped sample in the  $2\theta$  range between 2.8 and 7 (°) (heating rate of 10 °C /min,  $\lambda=0.20745\text{\AA}$ ).



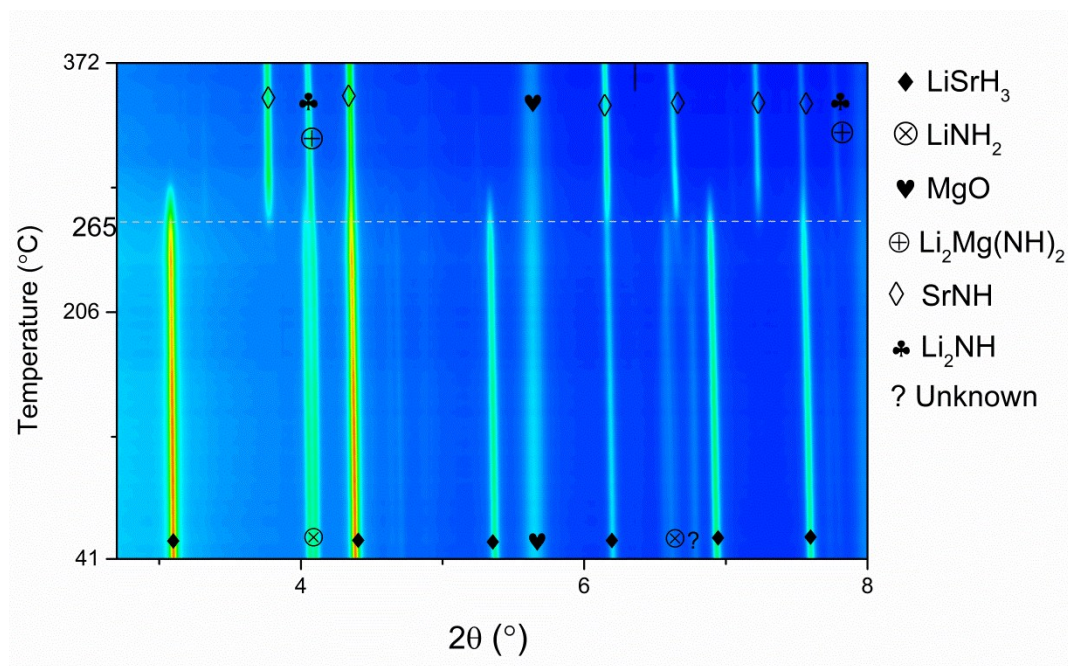

Figure S6. Contour plot of the second dehydrogenation of 0.2Sr(OH)<sub>2</sub>-doped sample in the 2θ range between 2.8 and 8 (°) (heating rate of 10 °C /min, λ=0.20745Å).
